# Supplementary material for: Targeted Therapy of HPV Positive and Negative Tonsillar Squamous Cell Carcinoma Cell Lines Reveals Synergy between CDK4/6, PI3K and Sometimes FGFR Inhibitors, but Rarely between PARP and WEE1 Inhibitors
Source: MDPI journal article supplement (doi:10.3390/v14071372), 2022-06-23
Supplement: s1 [file s1]

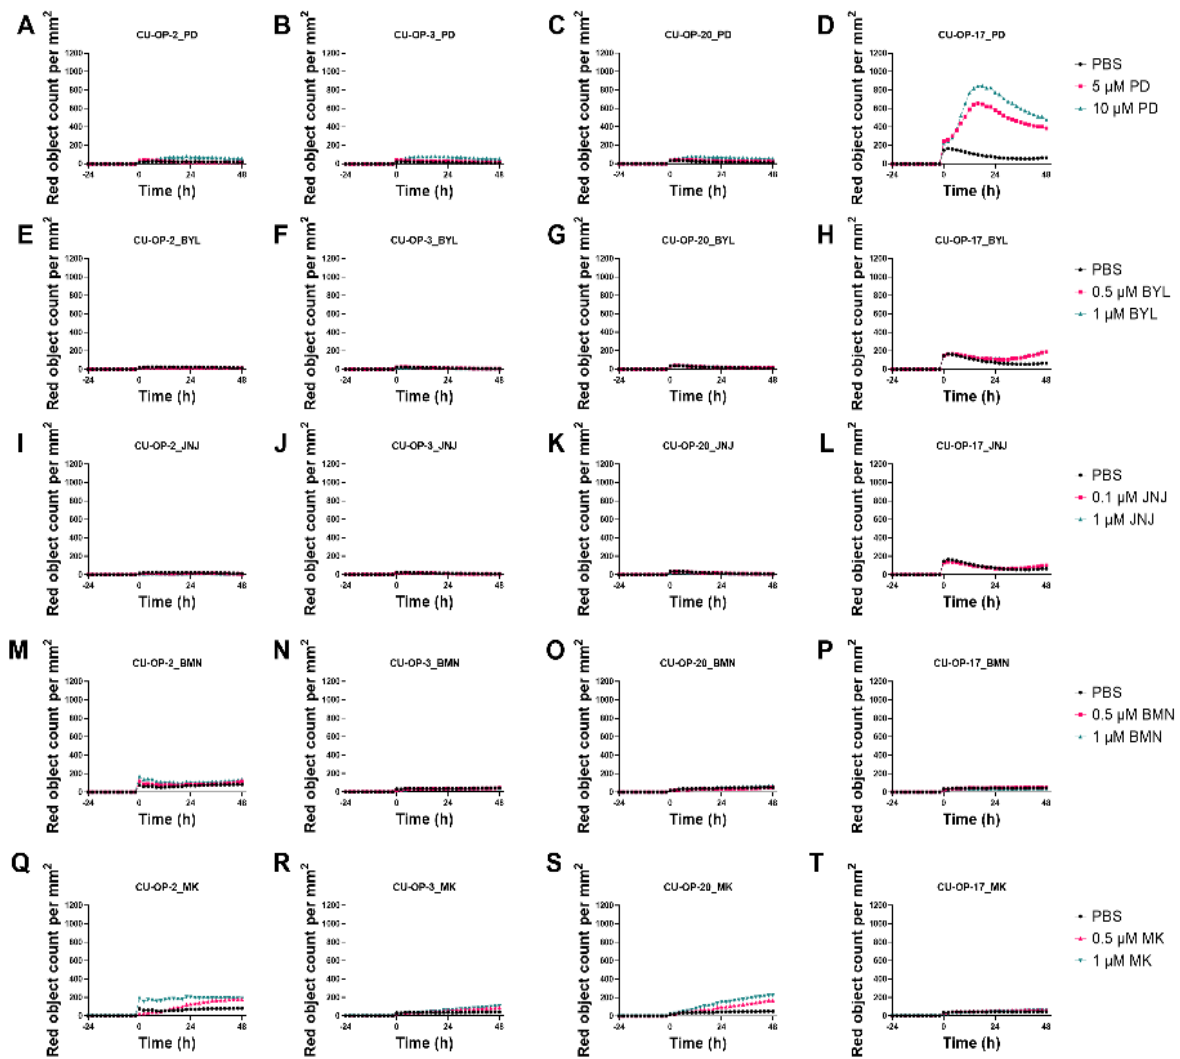

**Supplementary Figure S1.** Cytotoxicity of HPV<sup>+</sup> CU-OP-2, CU-OP-3, CU-OP-20, and HPV<sup>-</sup> CU-OP-17 cell lines upon treatment with PD-0332991, BYL719, JNJ-42756493, BMN-673 and MK-1775. Cytotoxicity of HPV<sup>+</sup> CU-OP-2, CU-OP-3, CU-OP-20, and HPV<sup>-</sup> CU-OP-17 after treatment with CDK4/6 inhibitor PD-0332991 (A-D), PI3K inhibitor BYL719 (E-H), FGFR inhibitor JNJ-42756493 (I-L), PARP inhibitor BMN673 (M-P) and WEE1 inhibitor MK-1775 (Q-T). The graphs represent one representative experimental run per cell line. Red objects count per mm<sup>2</sup> denotes cytotoxicity; PD denotes PD-0332991; BYL denotes BYL719; JNJ denotes JNJ-4275649; BMN denotes BMN-673 and MK denotes MK-1775.

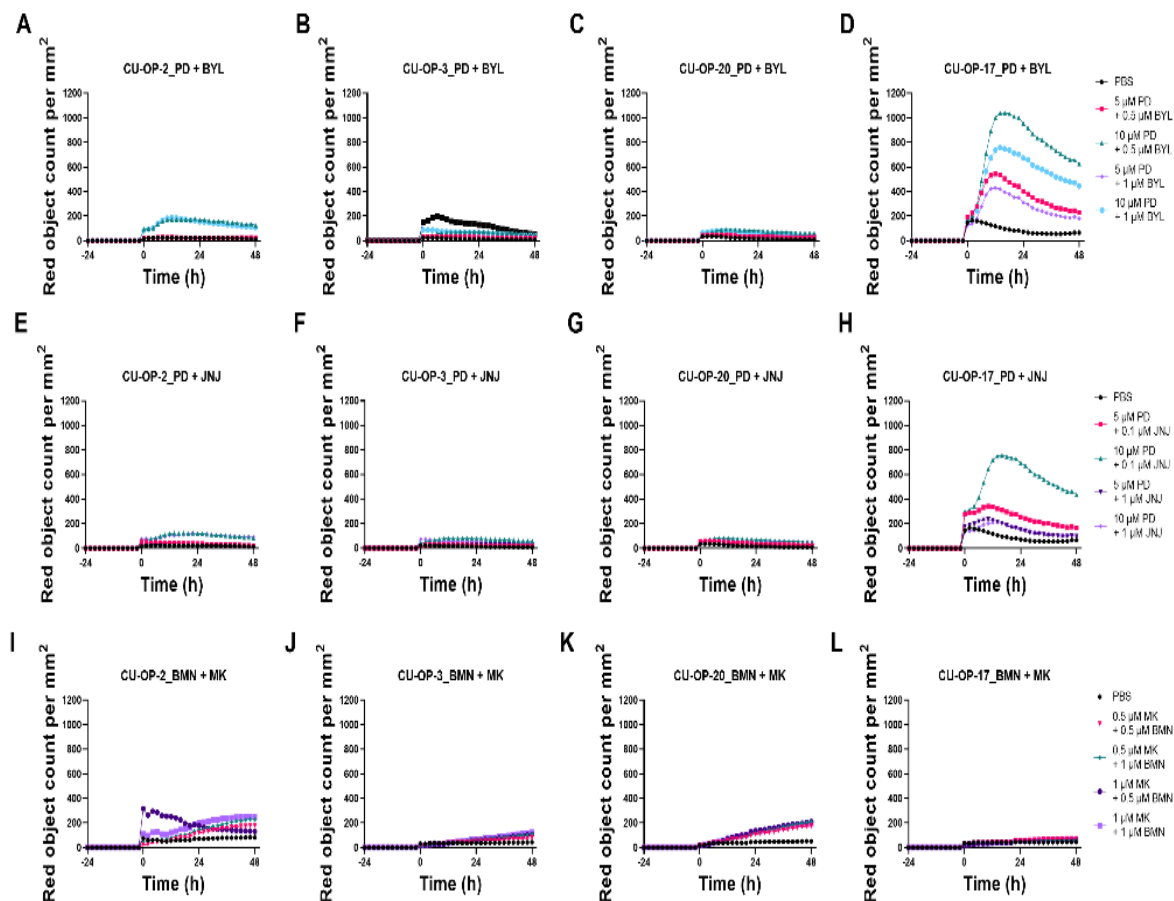

**Supplementary Figure S2.** Cytotoxicity of HPV<sup>+</sup> CU-OP-2, CU-OP-3, CU-OP-20, and HPV<sup>-</sup> CU-OP-17 cell lines upon combined treatment with PD-0332991 and BYL719 or JNJ-42756493 and BMN-673 and MK-1775. Cytotoxicity of HPV<sup>+</sup> CU-OP-2, CU-OP-3, CU-OP-20, and HPV<sup>-</sup> CU-OP-17 after treatment with CDK4/6 inhibitor PD-0332991 and PI3K inhibitor BYL719 (A-D) or with FGFR inhibitor JNJ-42756493 (E-H), or with the PARP inhibitor BMN673 and WEE1 inhibitor MK-1775 (I-L). The graphs represent one experimental run per cell line. Red objects count per mm<sup>2</sup> denotes cytotoxicity; PD denotes PD-0332991; BYL denotes BYL719; JNJ denotes JNJ-42756493; BMN denotes BMN-673 and MK denotes MK-1775.
